# Supplementary material for: Mapping of the CD23 Binding Site on Immunoglobulin E (IgE) and Allosteric Control of the IgE-FcϵRI Interaction
Source: PubMed Central journal article supplement — J Biol Chem. 2012 Jul 19;287(37):31457–61. doi: 10.1074/jbc.C112.397059 (PMC3438978; doi:10.1074/jbc.c112.397059), 2012-07-19
Supplement: supp_C112.397059_jbc.C112.397059-1.pdf [file supp_C112.397059_jbc.C112.397059-1.pdf]

Mapping of the CD23 binding site on IgE and allosteric control of the IgE-FcεRI interaction

**Susmita Borthakur<sup>1,\*</sup>, Richard G. Hibbert<sup>2,‡</sup>, Marie O.Y. Pang<sup>1</sup>, Norhakim Yahya<sup>1</sup>, Heather J. Bax<sup>1</sup>, Michael W. Kao<sup>1</sup>, Alison M. Cooper<sup>1</sup>, Andrew J. Beavil<sup>1</sup>, Brian J. Sutton<sup>1</sup>, Hannah J. Gould<sup>1</sup>, and James M. McDonnell<sup>1</sup>**

<sup>1</sup>From the Randall Division of Cell and Molecular Biophysics, King's College London, Guy's Campus, London, SE1 1UL, United Kingdom; MRC & Asthma UK Centre in Allergic Mechanisms of Asthma, London, United Kingdom. <sup>2</sup>Department of Biochemistry, Oxford University, Oxford, OX1 3QU, United Kingdom

Current address: \*Department of Physiology and Biophysics, Case Western Reserve University, Cleveland, OH 44106, USA. ‡Division of Biochemistry and Center for Biomedical Genetics, Netherlands Cancer Institute, Plesmanlaan 121, 1066 CX Amsterdam, The Netherlands

Running Title: *The CD23 binding site on IgE and IgE allostery*

To whom correspondence should be addressed: James M. McDonnell, Tel. +44 207 848 6970, Fax: +44 207 848 6435, Email: james.mcdonnell@kcl.ac.uk

Keywords: Allergy, allostery, antibody, CD23, Immunoglobulin E

---

FIGURE S1

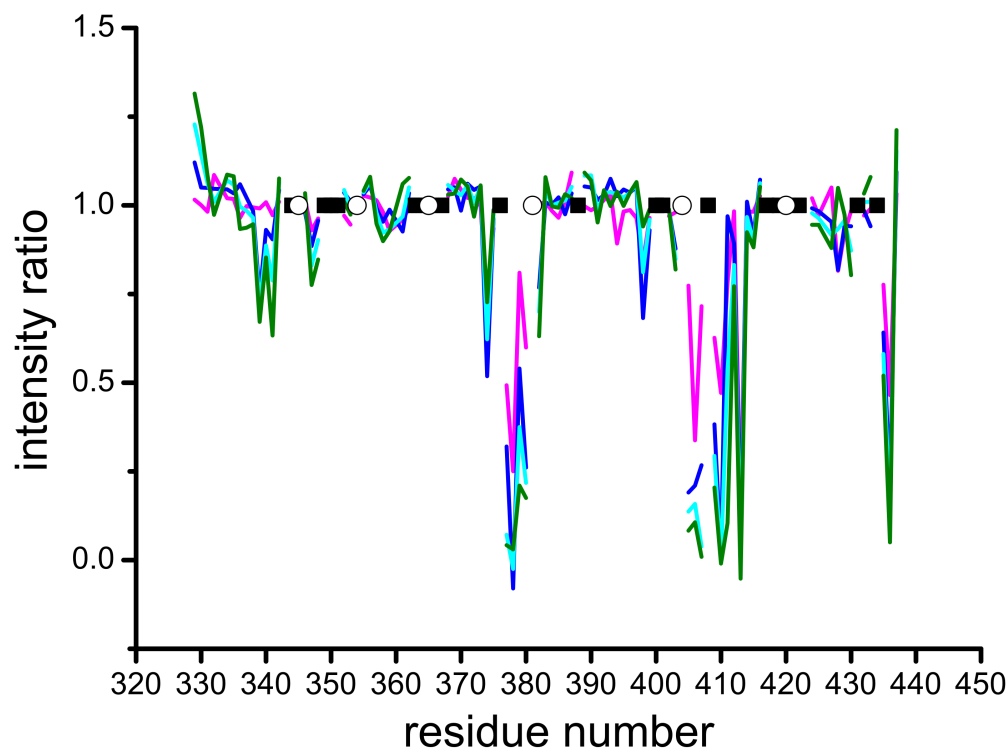

**Figure S1. Effect of CD23 titration on Cε3  $^1\text{H}$ ,  $^{15}\text{N}$ -HSQC peak intensities.** Increasing amounts of unlabelled derCD23 were added to a 200 μM sample of  $^{15}\text{N}$ -labelled Cε3 and changes in peak attenuation are plotted against residue number for four derCD23 titration points (magenta, 50 μM derCD23; blue, 100 μM derCD23; cyan, 150 μM derCD23; green, 200 μM derCD23). For each residue, peak intensity is compared to the value for the unbound state (defined as 100%) and also corrected for dilution effects by normalizing intensities against three residues that are unaffected by addition of derCD23. In this plot, residues are also identified for which we cannot estimate changes in peak, either because the residue is not assigned (open circles) or where peak overlap or low peak intensity in the unbound state makes quantitative analysis of peak attenuation impossible (black squares).
